# Supplementary material
Source: HighWire-hosted journal article supplement (https://jnm.snmjournals.org/highwire/filestream/94181/field_highwire_adjunct_files/0/jnm086959_Supplemental_Data.pdf)
Supplement: jnm086959_Supplemental_Data.pdf [file jnm086959_Supplemental_Data.pdf]

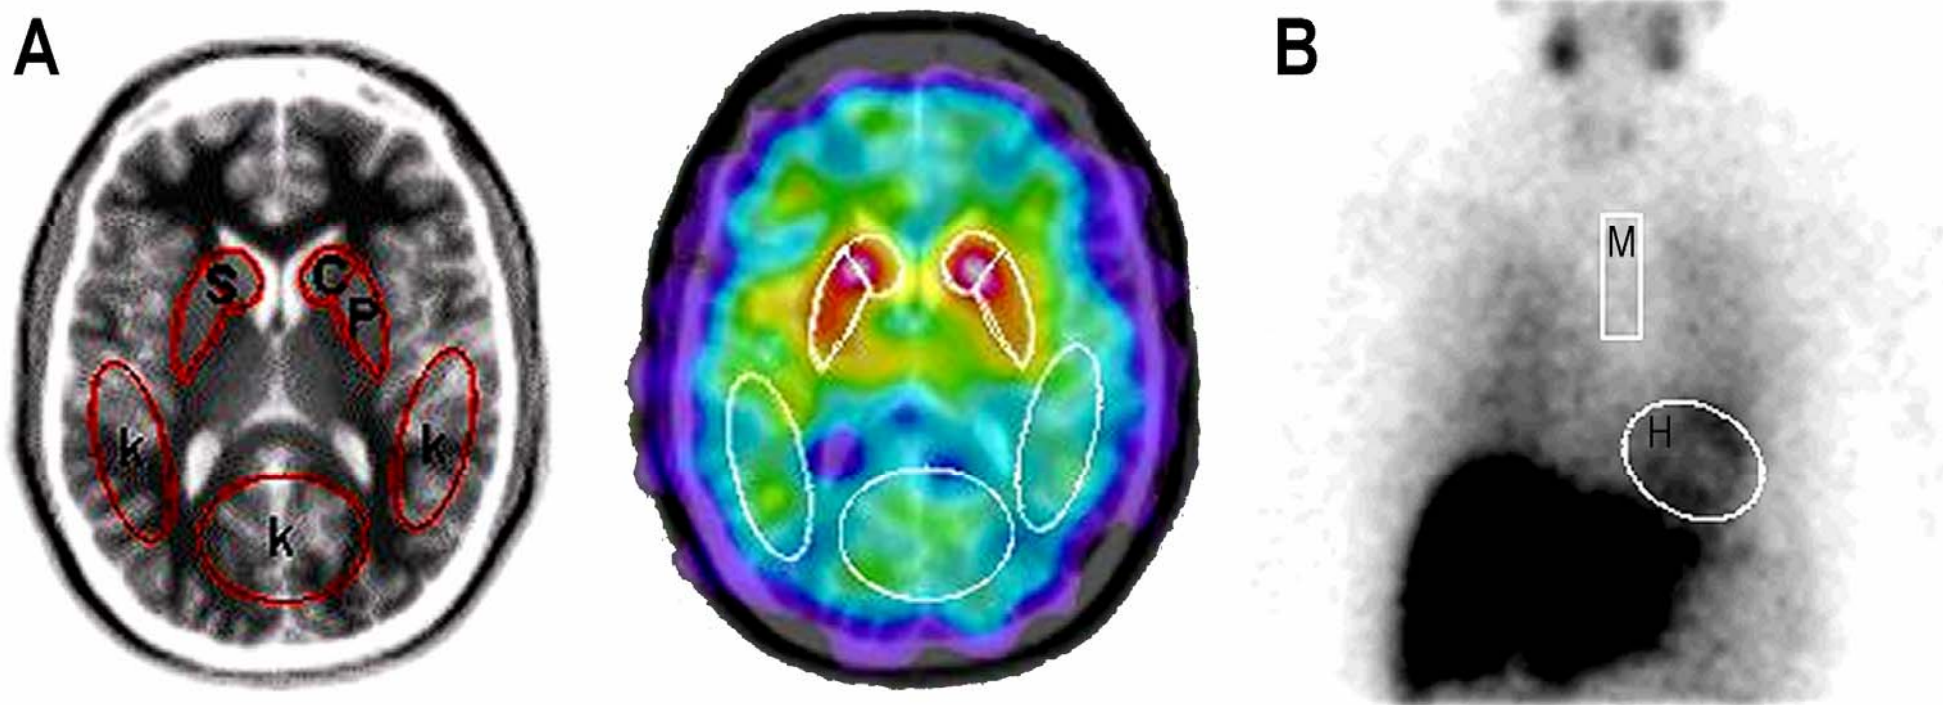

**Supplemental Figure 1 A - B:** Regions-of-interest (ROI) templates in brain (Fig. 1 A) and thorax (Fig. 1 B) employed for semiquantitative assessment of striatal dopamine D2-receptors, striatal dopamine transporters and myocardial noradrenergic innervation. Brain ROI templates were designed on a normalized MRI, transferred onto the 3D-adjusted SPECT dataset of a given individual and visually adjusted if necessary. The thoracic ROI template was visually adjusted on the planar scintigraphies.

Fig. 1 A: S = striatum, C caudate nucleus, P = putamen, K = posterior cortical areas;

Fig. 1 B: H = left ventricle myocardium, M = midline mediastinum.

Supplemental Table 1: Patients' clinical characteristics

| Patient no/sex/age | Disease | Disease duration, y at study inclusion | UPDRS-III Off/On at study inclusion | Follow up, m | Note          |
|--------------------|---------|----------------------------------------|-------------------------------------|--------------|---------------|
| 1/F/55             | PD      | 2                                      | 6 / +                               | 33           | PLTDR         |
| 2/M/64             | PD      | 0.5                                    | 11 / +                              | 34           | PLTDR         |
| 3/M/63             | PD      | 2                                      | 17 / +                              | 48           | PLTDR         |
| 4/F/61             | PD      | 1                                      | 6 / +                               | 38           | PLTDR         |
| 5/M/65             | PD      | 0.5                                    | 13 / +                              | 39           | PLTDR         |
| 6/M/72             | PD      | 0.5                                    | 11 / +                              | 25           | PLTDR         |
| 7/F/69             | PD      | 2                                      | 14 / +                              | 55           | PLTDR         |
| 8/M/53             | PD      | 1                                      | 14 / 7                              | 40           | PLTDR         |
| 9/M/61             | PD      | 2                                      | 7 / +                               | 49           | PLTDR         |
| 10/M/58            | PD      | 1                                      | 7 / +                               | 44           | PLTDR         |
| 11/F/44            | PD      | 2                                      | 8 / 3                               | 46           | PLTDR         |
| 12/M/74            | PD      | 2                                      | 8 / 4                               | 8            | PLTDR, †      |
| 13/F/63            | PD      | 10                                     | +                                   | 46           | PLTDR, MF     |
| 14/M/61            | PD      | 2                                      | 17 / +                              | 50           | PLTDR         |
| 15/F/67            | PD      | 1                                      | 44 / 30                             | 37           | PLTDR         |
| 16/F/66            | PD      | 2                                      | 18 / +                              | 55           | PLTDR, MF     |
| 17/M/68            | PD      | 4                                      | 44 / 30                             | 15           | PLTDR, †      |
| 18/M/68            | PD      | 8                                      | 54 / 37                             | 21           | PLTDR, MF     |
| 19/F/68            | PD      | 4                                      | 22 / 15                             | 32           | PLTDR         |
| 20/M/47            | PD      | 4                                      | 22 / 14                             | 34           | PLTDR, MF     |
| 21/M/74            | PD      | 10                                     | 34 / 22                             | 26           | PLTDR         |
| 22/M/41            | PD      | 4                                      | 60 / 20                             | 43           | PLTDR, DBS    |
| 23/F/63            | PD      | 13                                     | 58 / 8                              | 39           | PLTDR, DBS    |
| 24/M/73            | PD      | 19                                     | 50 / 20                             | 45           | PLTDR, DBS    |
| 25/M/67            | PD      | 21                                     | 61 / 20                             | 40           | PLTDR, DBS    |
| 26/M/68            | PD      | 8                                      | 53 / 35                             | 41           | PLTDR, MF     |
| 27/F/71            | PD      | 16                                     | 37 / 15                             | 55           | PLTDR, DBS    |
| 28/M/67            | PD      | 16                                     | 33 / 15                             | 41           | PLTDR, DBS    |
| 29/M/74            | PD      | 16                                     | 48 / 32                             | 27           | PLTDR, DBS    |
| 30/M/67            | PD      | 12                                     | 38 / 22                             | 9            | PLTDR, DBS, † |
| 31/M/73            | PD      | 21                                     | 57 / 31                             | 45           | PLTDR, MF     |
| 32/M/49            | MSA-P   | 4                                      | 47 / 47                             | 26           | NLTDR, †      |
| 33/M/63            | MSA-P   | 4                                      | 54 / 52                             | 27           | NLTDR, †      |
| 34/M/64            | MSA-P   | 2                                      | 17 / 13                             | 12           | PLTDR, †      |
| 35/M/52            | MSA-P   | 2                                      | 19 / 17                             | 21           | NLTDR, †      |
| 36/M/69            | MSA-P   | 5                                      | 51 / 50                             | 10           | NLTDR, †      |
| 37/M/70            | MSA-P   | 8                                      | 43 / 40                             | 15           | NLTDR, †      |
| 38/M/68            | MSA-P   | 3                                      | 9 / 9                               | 45           | NLTDR, UI     |
| 39/M/57            | MSA-P   | 6                                      | 42 / 37                             | 51           | PLTDR, †      |
| 40/M/58            | MSA-P   | 6                                      | 43 / 31                             | 31           | PLTDR, UI/FI  |
| 41/M/77            | MSA-P   | 7                                      | 14 / 13                             | 15           | NLTDR, †      |
| 42/F/68            | MSA-P   | 4                                      | 37 / 37                             | 15           | NLTDR, †      |
| 43/M/77            | PSP     | 1                                      | 21 / 18                             | 17           | NLTDR, PI/SO  |
| 44/M/64            | PSP     | 11                                     | 38 / 37                             | 38           | NLTDR, PI/SO  |
| 45/M/66            | PSP     | 6                                      | - / -                               | 29           | NLTDR, PI/SO  |
| 46/M/72            | PSP     | 13                                     | 26 / 26                             | 28           | NLTDR, †      |
| 47/M/78            | PSP     | 10                                     | 38 / 38                             | 31           | NLTDR, †      |
| 48/F/68            | PSP     | 6                                      | 21 / 18                             | 31           | NLTDR, PI/SO  |

PD = Parkinson's disease, MSA-P = Multi system atrophy Parkinsonian type, PSP = Progressive supranuclear palsy, F = female, M = male, y = years, m = months, MF = motor fluctuations, DBS = deep brain stimulation, † = died, UI = urinary incontinence, FI = faecal incontinence, PI = postural instability, SO = supranuclear ophthalmoplegia, PLTDR = positive long-term Levodopa response, NLTDR = negative long-term Levodopa response.
